**Title: Modelling glioblastoma tumour-host cell interactions using adult brain organotypic slice co-culture**

Maria Angeles Marques-Torrejon<sup>1</sup>, Ester Gangoso<sup>1</sup>, Steven M. Pollard<sup>1\*</sup>

**Authors Affiliations**

<sup>1</sup>MRC Centre for Regenerative Medicine and Edinburgh Cancer Research UK Cancer Centre, University of Edinburgh, 5 Little France Drive, Edinburgh EH16 4UU, UK.

**\* Corresponding author:**

Steven Pollard: [steven.pollard@ed.ac.uk](mailto:steven.pollard@ed.ac.uk) Tel: +44 (0)131 6519544

**Running title:** GBM stem cell niche interactions

**Keywords:** Glioblastoma, adult brain, niche, slice culture, quiescence, proliferation

## 2 **Abstract**

3           Glioblastoma (GBM) is an aggressive incurable brain cancer. The cells that fuel  
4 the growth of tumours resemble neural stem cells found in the developing and adult  
5 mammalian forebrain. These are referred to as GBM stem cells (GSCs). Similar to  
6 neural stem cells, GSCs exhibit a variety of phenotypic states: dormant, quiescent,  
7 proliferative and differentiating. How environmental cues within the brain influence  
8 these distinct states is not well understood. Laboratory models of GBM tumours can  
9 be generated using either genetically engineered mouse models, or via intracranial  
10 transplantation of cultured tumour initiating cells (mouse or human). Unfortunately,  
11 these approaches are expensive, time-consuming, low-throughput and ill-suited for  
12 monitoring of live cell behaviours. Here we explored whole adult brain coronal  
13 organotypic slices as a complementary strategy to remove the experimental  
14 bottleneck. Mouse adult brain slices remain viable in a neural stem cell serum-free  
15 basal media for several weeks. GSCs can therefore be easily microinjected into  
16 specific anatomical sites *ex vivo*. We demonstrated distinct responses of engrafted  
17 GSCs to different microenvironments in the brain. Within the subependymal zone –  
18 one of the adult neural stem cell niches – a subset of injected tumour cells could  
19 effectively engraft and respond to endothelial niche signals. GSCs transplanted slices  
20 were treated with the anti-mitotic drug temozolomide as proof-of-principle of the utility  
21 in modelling responses to existing treatments. Thus, engraftment of mouse or human  
22 GSCs onto whole brain coronal organotypic brain slices provides a convenient  
23 experimental model for studies of GSC-host interactions and preclinical testing of  
24 candidate therapeutic agents.

25

## 26 **Introduction**

27           Glioblastoma multiforme (GBM) is a highly aggressive malignant brain tumour.  
28 It is the most malignant form of glioma. Standard treatments involve combined  
29 surgery, radiotherapy, and adjuvant temozolomide (TMZ) chemotherapy (Stupp et al.,  
30 2005). However, long-term survival rates are extremely poor. Various obstacles  
31 hamper development of effective therapies, including: pervasive tumour cell  
32 infiltration, genetic heterogeneity (both intra- and inter-tumoural), therapeutic  
33 resistance, blood-brain barrier, and lack of biological understanding of the disease.  
34 Improved experimental models will help address some of these issues.

35           GBM tumour cells disseminate widely across many brain regions, often  
36 following neuronal tracts and vasculature. Cells are therefore exposed to diverse  
37 microenvironments, such as specific repertoires of cell matrix and growth factors, or  
38 cellular niches (e.g. perivascular, invasive or hypoxic). These environmental cues  
39 steer glioma stem cell (GSC) fate, affecting quiescence, proliferation, survival and  
40 differentiation pathways (Codrìci et al., 2016; Gilbertson and Rich, 2007). Modelling  
41 these various tumour cell-host brain interactions is therefore vital for improved  
42 understanding of disease biology and development of new therapeutic strategies.

43           GSCs hijack many molecular programs that regulate neural stem cell self-  
44 renewal. Improved understanding of mechanisms controlling neural stem cell fate will  
45 therefore likely lead to new insights into the disease and identification of critical  
46 therapeutic targets. Neural stem cells (NSCs) are located within the lateral walls of the  
47 forebrain ventricles in a region known as the subependymal zone (SEZ) (Doetsch et  
48 al., 1999). The SEZ provides a specific niche that sustains the NSCs throughout life.  
49 NSCs are exposed to a myriad of cell-cell signals and ECM interactions that steer  
50 NSC fate, such as: endothelial cells, ependymal cells, and cerebral spinal fluid

51 (Mirzadeh et al., 2008; Shen et al., 2008; Silva-Vargas et al., 2016). Understanding  
52 how tumour cells respond to normal SEZ is important, as this might serve as a  
53 reservoir of tumour cells that underlie relapse in some patients (Piccirillo et al., 2015).

54 Patient-derived GSCs can be routinely expanded *in vitro* using culture media  
55 developed for NSCs, either in suspension or adherent culture (Galli et al., 2004;  
56 Hemmati et al., 2003; Lee et al., 2006; Pollard et al., 2009; Xie et al.). Orthotopic  
57 transplantation of freshly isolated or cultured GSCs into the adult rodent brain using  
58 stereotaxic surgery is the 'gold standard' method to test tumour-initiating potential.  
59 However, animal surgery and transplantation deep into the brain provides limited  
60 experimental outputs: survival curves and end-point analysis of the resultant tumours.  
61 Typically, these experiments take weeks or months and are non-trivial to setup. They  
62 do not enable direct inspection of single cell behaviours such as invasion, monitoring  
63 of quiescence and differentiation or responses to genetic or chemical perturbations.  
64 These practical constraints have limited the scale and scope of studies aimed at  
65 understanding and treating gliomas. To address this we explored the utility of  
66 organotypic slice cultures to monitor GSC-host interactions.

67 Organotypic brain slice cultures were first developed in the 1960's (Crain,  
68 1966). Since then they have been widely used by neuroscientists, particularly in  
69 studies of neuronal function and circuits (reviewed in (Humpel, 2015)). Microdissected  
70 regions are cultured above a semipermeable membrane in a cell culture insert and  
71 exposed to serum-containing media from below. An example of their value are studies  
72 using hippocampal slices cultures, widely deployed for studies of synaptic plasticity  
73 and memory (Gahwiler et al., 1997). Organotypic slice cultures overcome some of the  
74 difficulties of *in vivo* studies as they provide *ex vivo* access to brain tissue architecture,

75 while still enabling direct observation and cell manipulations in the culture dish  
76 (Humpel, 2015).

77 In this study we demonstrate improved conditions enabling serum-free culture  
78 of adult coronal whole brain slices in a manner that enables tracking of GSC  
79 behaviors over several weeks. Our experimental approach provides a useful new  
80 strategy to explore GBM. This model bridges the ‘experimental gap’ between *in vitro*  
81 cell culture models and *in vivo* orthotopic transplantations. As an exemplar of the utility  
82 of this approach we confirm engraftment of GSCs around blood vessels in the slice  
83 culture and demonstrate how the method can be used in preclinical studies of  
84 anticancer agents.

85

## 86 **Results**

### 87 **Whole adult brain coronal slice cultures are viable for weeks in serum-free** 88 **neural stem cell media**

89 Most studies employing organotypic slice cultures use postnatal mice and  
90 dissect specific brain regions (e.g. hippocampus). However, GBM is predominantly a  
91 disease of adults and cells disseminate across all brain regions. We therefore focused  
92 on whole brain slices, reasoning that even short-term viability, for days or weeks,  
93 could provide a useful model for testing tumour cell-host brain interactions.

94 Adult brains were harvested from young adult mice (~4 weeks) and the  
95 olfactory bulbs and cerebellum were removed (Figure 1A and B). We generated  
96 whole-brain coronal sections using a vibratome to cut ~200um slices at the level of the  
97 forebrain ventricle (6 slices per brain). Each section was placed on to a semi-  
98 permeable membrane culture insert and cultured in a six well cell culture plate (Figure  
99 1B).

100 Established organotypic brain slice protocols require high levels of serum or  
101 growth factors. However, serum exposure will trigger astrocyte differentiation of NS  
102 cells (Conti et al., 2005) (Figure S1A-B). Culture media lacking serum or exogenous  
103 growth factors was therefore tested. This reduces the risk of cell fate being primarily  
104 directed by additives in the culture media, rather than endogenous tissue-derived  
105 signals. Dying cells were identified at edges of the dissected region, using staining for  
106 propidium iodide (PI). Serum-free NS cell-permissive culture media could indeed  
107 support slices over several weeks (Figure 1C). By contrast, in basal media with no N2  
108 or B27 supplements, tissues became necrotic in days (Figure S1C).

109           Within the healthy coronal sections, we were able to detect Dcx-expressing  
110 neuroblasts, gliotubes and choroid plexus, suggesting the tissue retained key features  
111 of a viable neurogenic niche (Figure 1D). In summary, whole brain coronal slices are  
112 viable for several weeks in serum-free media – much longer than we anticipated –  
113 thereby providing an opportunity to assess responses of transplanted GSCs.

114

115   **Patient-derived glioblastoma stem cells engraft into the mouse SEZ and retain**  
116 **expression of quiescent NSC markers CD133 and CD9.**

117           We next tested the potential of patient-derived human GSCs to engraft into the  
118 slices. G7-GFP cells have previously been shown to be highly invasive when  
119 transplanted into striatum of immunocompromised mice (Stricker et al., 2013). We first  
120 tested microinjection of 10000 cells into the SEZ (Figure 2A). One week later using  
121 live cell imaging we noted large numbers of healthy GFP expressing cells successfully  
122 engrafted. After 2 weeks slices were fixed and immunocytochemistry (ICC) confirmed  
123 cells were viable and based on Ki67 and Stem121 expression ~10% were actively  
124 proliferating (Figure 2B). We next assessed the known cancer stem cell marker  
125 CD133 in the GFP cells after three weeks. Interestingly, CD133 expressing cells were  
126 identified in a subset of cells, suggesting that GSCs generate phenotypic  
127 heterogeneity in the slices and retain cells with cancer stem cell phenotype (Figure  
128 2C).

129           New molecular markers associated with quiescent NSCs have recently been  
130 uncovered using single cell RNA-seq approaches (Llorens-Bobadilla et al., 2015; Shin  
131 et al., 2015). The transmembrane glycoprotein tetraspin (CD9) was identified as a  
132 putative marker of qNSCs. Many of the G7 cells that were transplanted within the SEZ

133 expressed CD9 (Figure 2D). We conclude that human GSCs can engraft, survive and  
134 proliferate in whole-brain slice co-cultures for at least 3 weeks, and can retain  
135 expression of key cancer stem cell markers.

136

137 **Patient-derived glioblastoma stem cells have distinct responses to region-**  
138 **specific adult brain microenvironments**

139 We next compared how cells would respond in the SEZ versus other brain  
140 regions in terms of their proliferation and differentiation. Four distinct regions were  
141 tested: striatum, corpus callosum (CC), cortex and SEZ (Figure 3A). One week after  
142 microinjection into a lateral region of the CC, we noted many G7 cells aligning with  
143 and dispersing across the white matter tracts and displaying infiltrative morphology.  
144 These cells displayed reduced Ki67 and increased GFAP compared to cells deposited  
145 in parallel within the SEZ of the same slice (Figure 3B-C). Similar findings were seen  
146 for cells within the cortex and striatum. Thus, slice cultures provide a convenient  
147 method to quickly assess responses of GSCs to the diverse anatomical  
148 microenvironments within the adult brain. This enables future exploration of various  
149 candidate factors that might influence cell fate within the SEZ niche.

150

151 **Mouse glioblastoma-initiating cells engraft into the subependymal zone and can**  
152 **juxtapose to endothelial cells**

153 To minimize disruption of the niche and to enable injection of smaller  
154 volumes/numbers of cells (~100 cells in ~40nl) we performed transplantation of cells  
155 using a glass capillary linked to a microinjection pump (Figure 1B-C). This enabled  
156 more precise and localized injection into the walls of the lateral ventricle (Figure 4A).



157 We used a previously characterised mouse tumour-initiating cell line, termed IENS-  
158 GFP (Ink4A/Arf<sup>-/-</sup> deleted with EGFRvIII overexpression) (Bruggeman et al., 2007).  
159 These cells stably express GFP from a constitutive promoter. In vitro they express  
160 GSC markers such as Nestin, Sox2, Olig2 (Figure S2A). IENS cells generate  
161 aggressive infiltrative tumours when transplanted *in vivo* (n=4) (Figure S2B). These  
162 were preferred to human patient-derived G7-GFP, as these displayed brighter GFP  
163 and were less clumpy.

164 IENS cells were injected precisely into the SEZ through the wall of the lateral  
165 ventricle. Initially, they displayed a remarkably specific localization and even  
166 distribution throughout the SEZ (Supplementary Movie 1). Cells injected in parallel into  
167 the striatum also survived and engrafted, but dispersed locally (Figure S2C). This may  
168 suggest a preference, or homing, to the SEZ (Figure 4A), similar to previous reports  
169 for normal NSCs (Kokovay et al., 2010). When imaged using confocal microscopy we  
170 noted juxtaposition of GSCs with endothelial cells (Figure 4C and Supplementary  
171 movie 2). 5 days after microinjection the rate of proliferation was around 40-50%  
172 (measured as Ki67<sup>+</sup> cells of the GFP cells). ~15% began to express high levels of the  
173 astrocytic marker GFAP (Figure 4D). Cells remained viable for two weeks and showed  
174 evidence of proliferation and local infiltration into surrounding regions (n=3) (Figure 4B  
175 and Movie 1 and 2).

176

## 177 **Glioblastoma stem cells engrafted into brain slices respond to the cytostatic** 178 **effects of temozolomide**

179 Whole brain slice cultures with engrafted GSCs provides a convenient, easier  
180 and higher throughput experimental system to explore the effects of pharmacological

181 agents in than use of live whole animal studies. To demonstrate proof-of-principle of  
182 potential use in preclinical studies we explored effects of anti-mitotic treatments. Ara-C  
183 or Temozolomide (TMZ) have been widely used to explore neural stem cell behavior  
184 during regeneration and repair (Daynac et al., 2016; Doetsch et al., 1999). TMZ is the  
185 standard chemotherapy given to many patients with GBM. Both agents drive DNA  
186 damage and disrupt proliferation of tumour cells. TMZ is a DNA alkylating agent that  
187 often induces G2/M arrest.

188 Cellular responses were scored using immunocytochemistry for two markers:  
189 gamma-H2AX for double strand breaks, and p53 as an indicator of DNA damage  
190 response (Figure 5A). We first tested activity of each factor at previously reported  
191 effective doses on IENS-GFP cultures *in vitro*, TMZ at 1,10 and 100 $\mu$ M and AraC at 1  
192 and 2  $\mu$ M (Figure 5A-B). We next treated slices harbouring successfully engrafted  
193 IENS-GFP cells after 3 days with 100 $\mu$ M TMZ or 1 $\mu$ M Ara-C (24hr). Slices were then  
194 assessed for Ki67 and pHH3 using immunocytochemistry (Figure 5E-F). In each  
195 condition we observed a reduction in Ki67 and GFP double positive cells (100 $\mu$ M  
196 TMZ: 8%, 1 $\mu$ M Ara-C: 11%). Untreated control slices retained ~30% double positive  
197 (Figure 5E-F). Cytostatic responses of tumour cells to drug treatment can therefore  
198 easily be monitored within slice co-cultures.

## 199 **Discussion**

200 Primary cell cultures of human GBM stem cells are an important and disease-  
201 relevant in vitro experimental tool. However, an obvious limitation of dissociated cell  
202 cultures is the difficulty in modelling interactions with the complex tissue environment.  
203 Here we have demonstrated that brain tumour cell interactions with host brain tissue  
204 can be explored effectively using co-culture of in vitro expanded mouse and human  
205 GSCs with adult brain slices.

206 Past organotypic methods have typically used micro-dissected regions of  
207 postnatal brain slices cultured in the presence of serum, as this facilitates the support  
208 of long-term viability (months) (Ullrich et al., 2011). Yet our observations indicate that  
209 whole brain adult coronal slices are viable in serum free media for several weeks. This  
210 is long enough to permit tracking of tumour-host tissue interactions, such as  
211 interactions with endogenous stem cell niches or white matter tracts and enabled us to  
212 test GSCs interactions with brain tissue. These methods therefore provide a tractable  
213 ex vivo model system that can now be exploited in both basic and translational studies  
214 of GBM. It is an approach that reduces the need for laborious and expensive mouse  
215 breeding or stereotaxic surgery, thereby increasing the speed and experimental  
216 throughput.

217 Avoiding exposure of transplanted cells to high levels of serum within the slice  
218 cultures enables a more physiological signaling environment to be maintained. This  
219 reduces the degree of serum-induced astrocyte differentiation which has hampered  
220 our previous studies (unpublished observations). Although serum free media has been  
221 used to maintain whole-mount tissue explants of the mouse SEZ for up to 16 hours  
222 (Kokovay et al., 2010), to our knowledge longer term survival of whole coronal brain  
223 slices in serum free media has not be reported for studies of GSCs. Surprisingly, we

224 found that serum wasn't needed in order to maintain healthy slices of the whole adult  
225 coronal brain for many weeks. Slices seems viable in the basal neural media with no  
226 exogenous growth factors and supplemented only with N2 and B27 hormonal  
227 supplements.

228         With viable coronal adult brain slices we were able to assess the responses of  
229 both mouse and human GSCs to distinct anatomical regions over several weeks of co-  
230 culture. As each mouse can provide up to 5 or 6 slices and cells can easily be injected  
231 in a spatially-restricted manner. Live cell imaging can be performed to track dynamic  
232 cell behaviors, such as interactions with blood vessels, infiltration or division  
233 (Supplementary Movie 1). For example, GBM cells infiltrate widely, and have been  
234 shown to use both neuronal tracts and blood vessels as a substrate and guide for  
235 migration (Farin et al., 2006; Krusche et al., 2016). The slice cultures reported here  
236 should be useful in probing such distinct cellular mechanisms of infiltration. Another  
237 future potential application will be the tracking of cell lineage reporters, especially with  
238 the advent of genome editing tools that can be applied in GBM (Bressan et al., 2017).  
239 This will also help shed light on mechanisms of GSC dormancy and quiescence.  
240 Future studies might also make use of short-term immunological responses to the  
241 engrafted tumour cells, such as interactions/activation of microglia.

242         We were particularly interested in assessing tumour cell responses within the  
243 SEZ. The SEZ provides a specific niche that sustains the NSCs, and a repertoire of  
244 cell-cell signals and ECM interactions that steer NSC fate, including: endothelial cells,  
245 ependymal cells, and cerebral spinal fluid (produced by the choroid plexus) (Mirzadeh  
246 et al., 2008; Shen et al., 2008; Silva-Vargas et al., 2016). We noted key elements of  
247 the healthy SEZ microenvironment were viable – ventricle, gliotubes, RMS,  
248 ependymal cells. Importantly, endothelial cells within this region are thought to serve

249 as an important niche signal; indeed, we noted close interactions between vessels  
250 and tumour cells, with extended processes and wrapping around the vessel, highly  
251 reminiscent of normal NSC interactions (Kokovay et al., 2010).

252 We demonstrated that human GSCs can engraft effectively into the tissue of  
253 SEZ of immunocompetent. CD133 is expressed by many glioma stem cells. We  
254 observed expression of this marker in both the mouse and human GSCs. Another  
255 more recently proposed marker of the quiescent astrocytes is CD9. We and others  
256 have recently found increased levels of CD9 in GSCs compared to normal NSCs  
257 (Okawa et al., 2016b; Podergajs et al., 2015). CD9 is expressed on cells within the  
258 SEZ, suggesting 'stemness' may be effectively retained. As anticipated, reduced  
259 proliferative responses were noted when cells were deposited at other anatomical  
260 sites, such as corpus callosum. Distinct brain regions clearly will have significant  
261 differences in their ability to influence tumour cell proliferation and differentiation and  
262 this can now be further explored using this model.

263 A limitation of this technique might be the difficulties of achieving viable slice  
264 cultures past 3 weeks. Although we did note some loss of some tissue integrity past  
265 three weeks, we did not specifically assess later time points or search for modified  
266 culture regimes. This might be important to resolve in future, particularly for slower  
267 growing human GSCs, which take weeks to months to start initiate tumour growth in  
268 live xenografted mice.

269 A multitude of new therapeutic agents are emerging that will require effective  
270 preclinical studies before entering clinical trials for GBM. There is bottleneck and huge  
271 cost associated with testing of new pharmacological agents in living animals. The  
272 methods outlined here offer one potential solution. To demonstrate potential utility as  
273 preclinical model, we tested the responses of cells to anti-mitotics (AraC and TMZ).

274 TMZ is used in many GBM patients, yet our understanding of how it influences distinct  
275 compartments of the GSC and resistance mechanisms remains limited. Future  
276 candidate drugs will need to be explored alongside TMZ to search for the most  
277 effective doses and regimes.

278 In conclusion, the organotypic method presented here provides a simplified  
279 model for assessing responses of GSCs to various brain anatomical sites and  
280 microenvironments. This experimental model will therefore complement existing in  
281 vitro and in vivo models, helping to prioritise genes and pathways controlling key  
282 malignant properties of GBM and aiding the preclinical testing of new anti-cancer  
283 agents.

284

## 285 **Materials and Methods**

### 286 **Organotypic adult brain slice culture.**

287 4-8 week-old C57BL/6 mice were used. More consistent results were often  
288 obtained using the younger animals – particularly the viability after 2-3 weeks culture.  
289 The brain was removed from the skull and transferred to a 10cm<sup>2</sup> tissue culture dish  
290 with sterile PBS and placed on ice (Figure 1A-1B). Cerebellum and olfactory bulb were  
291 removed (Figure 1B) and remaining forebrain transferred into a 35mm<sup>2</sup> dish with pre-  
292 warmed 3% SeaPlaque™ agarose (50100 Lonza) (Figure 1A-1B). Upon cooling in ice  
293 the block was removed and cut using a scapel into a ~ 2cm cube around the brain.  
294 Prior to sectioning a 6-well plate was prepared: in each well we introduced one cell  
295 culture insert (PICMORG50 Millicell) and added below it 1mL of culture media in  
296 serum-free basal NS cell media, DMEM:F12 supplemented with N2 and B27 (Life  
297 Technologies). The embedded brain was placed in the circular vibratome plate with  
298 adhesive (Figure 1A-1B). The vibratome (Leica VT1000 S) plate was fixed in the  
299 platform and was filled with PBS with penicillin-streptomycin (Gibco 15140-122 1:100).  
300 250 µm thick slices were cut, with vibrating frequency set to 8 and speed to 3. Each  
301 slice was transferred using a small brush onto the top of a Millipore culture insert  
302 (Figure 1A-1B). Six slices were cut per animal along the SEZ. The platform has to be  
303 maintained cooled all the time. We obtained six slices around the forebrain ventricle.  
304 The 6 well plate was placed in an incubator at 37°C + 5% CO<sub>2</sub>. Slices were incubated  
305 for 1-2 days prior to cell transplantation.

### 306 **Glioblastoma cancer stem cell transplantation onto brain slices**

307 G7 human GBM stem cell cultures have been previously described (Stricker et  
308 al., 2013). For human cell transplants a standard Gilson pipette was used to deposit

309 0.2 ul of cells onto the centre of the striatum, the typical injection site when performing  
310 stereotaxic surgery for tumour initiation assays. These cells engrafted well into the  
311 slice and their integration could be observed the following day.

312 IENS-GFP mouse cells were a gift from Prof M. Lohuizen (Bruggeman et al., 2007).  
313 Both mouse and human GNS cells were grown using conditions previously described  
314 (Pollard et al., 2009). After centrifugation cells were harvested and resuspended in  
315 media at 100,000 cells/ul. Cells were used immediately for transplantation in the SEZ.  
316 Two different methods of cells injection were used. A manual using a p2 Gilson pipette  
317 was used to injected 0.5ul, while an auto-nanoliter injector (Nanoject II, Drummond  
318 Scientific Company) was used for 40-100nl injections. For the injector we use glass  
319 capillaries pulled using an automated needle puller (tip diameter, 10–20  $\mu\text{m}$ ;  
320 Drummond) (Figure 1B). 4000 cells were transplanted per injection. 20000 cells were  
321 transplanted when the P2 pipette was used. To facilitate engraftment and prevent  
322 wide dispersion of the 0.2 ul of cells, we used forceps to make a small indentation in  
323 the transplant site prior to delivery of the cells. Slices with cells were incubated at  
324 37°C + 5% CO<sub>2</sub> for 7 days, with fresh NS cell media (no EGF or FGF-2) added every  
325 2 days. Cell engraftment was observed 4d after transplantation and cells could were  
326 monitored using a fluorescence stereomicroscope (Leica M165 FC). For anti-mitotic  
327 treatments in the IENS-GFP in vitro, different doses of the cytosine arabinoside (AraC)  
328 (Sigma) were added to the complete media. For anti-mitotic treatments of IENS-GFP  
329 in the slices, the cells were grown in the brain slice for 3 days and the AraC was  
330 added to the complete media at different doses at 1uM and TMZ at 100uM for 24hr.

331

332



### 333 **Immunocytochemistry**

334 Media was removed and exchanged for 1mL of freshly prepare 4% paraformaldehyde  
335 (PFA). 1-2 mL was also placed gently on top to cover the slice. After 2 hours PFA was  
336 removed and brain slices were wash with PBS three times. Slices were transfer using  
337 a brush to a 24 well plate. Slices were incubated at room temperature 1.5hr in  
338 blocking solution (0.2% Triton X-100 and 3% Goat Serum; Sigma). Primary antibodies  
339 GFAP (G3893 Sigma 1:100), Ki-67 (RM-9106 Thermo Fisher 1:100), GFP (13970  
340 Abcam 1:100), CD31 (14-0311-81 eBioscience 1:100), CD9 (14-0091-82, eBioscience),  
341 CD133 (MAB4310, Millipore), DCX (AB2253 Millipore), Nestin (1/10 Hybridoma Rat  
342 401, DSHB), stem121(440410, Cellalartis), pHH3 (50-9124-41, eBioscience), H2AX  
343 (phosphor S139) (ab81299, Abcam).

344 For H2AX staining cells were fixed in methanol-acetone 1:1 for 10min at room  
345 temperature. Positive cells were scored using the Fiji image analysis software. For  
346 IHC, the primary antibodies were incubated for 2d at 4°C. After three washes with  
347 PBS, slices were incubated with appropriate Alexa Fluor (Life technologies) secondary  
348 antibody and DAPI (D9542-SIGMA) with for 4-6 hours. Slices were washed three  
349 times and were mounting in a slide and immersed in FluoroSave<sup>TM</sup> Reagent (345789  
350 Calbiochem). Slices were examined with a confocal microscope (Leica TCS SP8).  
351 Propidium iodide (14289-25 CAYMAN) was used at 5ug/ml in PBS for 5 min and the  
352 tissue was analyzed under the fluorescent stereomicroscope.

353

354 **Acknowledgements**

355 We are very grateful for the support provided for imaging from Bertrand Vernay  
356 (University of Edinburgh). Raul Bressan and Kirsty Ferguson provided helpful  
357 comments on the manuscript. MAMT was supported by a Postdoc EMBO Long-Term  
358 Fellowship. EG was supported by a Postdoc fellowship from Fundacion Ramon  
359 Areces (Spain). SMP is supported by a Cancer Research UK Senior Research  
360 Fellowship (A19778).

361

## 362 References

- 363 **Bressan, R. B., Dewari, P. S., Kalantzaki, M., Gangoso, E., Matjusaitis, M.,**  
364 **Garcia-Diaz, C., Blin, C., Grant, V., Bulstrode, H., Gogolok, S., et al. (2017).**  
365 **Efficient CRISPR/Cas9-assisted gene targeting enables rapid and precise genetic**  
366 **manipulation of mammalian neural stem cells. *Development* dev.140855.**
- 367 **Bruggeman, S. W. M., Hulsman, D., Tanger, E., Buckle, T., Blom, M.,**  
368 **Zevenhoven, J., van Tellingen, O. and van Lohuizen, M. (2007).** Bmi1 controls  
369 tumor development in an Ink4a/Arf-independent manner in a mouse model for  
370 glioma. *Cancer Cell* **12**, 328–341.
- 371 **Codrici, E., Enciu, A.-M., Popescu, I.-D., Mihai, S. and Tanase, C. (2016).** Glioma  
372 Stem Cells and Their Microenvironments: Providers of Challenging Therapeutic  
373 Targets. *Stem Cells International* **2016**, 5728438–20.
- 374 **Conti, L., Pollard, S. M., Gorba, T., Reitano, E., Toselli, M., Biella, G., Sun, Y.,**  
375 **Sanzone, S., Ying, Q. L., Cattaneo, E., et al. (2005).** Niche-independent  
376 symmetrical self-renewal of a mammalian tissue stem cell. *PLoS Biol.* **3**, e283.
- 377 **Crain, S. M. (1966).** Development of “organotypic” bioelectric activities in central  
378 nervous tissues during maturation in culture. *Int. Rev. Neurobiol.* **9**, 1–43.
- 379 **Daynac, M., Morizur, L., Chicheportiche, A., Mouthon, M.-A. and Boussin, F. D.**  
380 **(2016).** Age-related neurogenesis decline in the subventricular zone is associated  
381 with specific cell cycle regulation changes in activated neural stem cells. *Sci Rep*  
382 **6**, 21505.
- 383 **Doetsch, F., Caillé, I., Lim, D. A., Garcia-Verdugo, J. M. and Alvarez-Buylla, A.**  
384 **(1999).** Subventricular zone astrocytes are neural stem cells in the adult  
385 mammalian brain. *Cell* **97**, 703–716.
- 386 **Farin, A., Suzuki, S. O., Weiker, M., Goldman, J. E., Bruce, J. N. and Canoll, P.**  
387 **(2006).** Transplanted glioma cells migrate and proliferate on host brain  
388 vasculature: a dynamic analysis. *Glia* **53**, 799–808.
- 389 **Gahwiler, B. H., Capogna, M., Debanne, D., McKinney, R. A. and Thompson, S.**  
390 **M. (1997).** Organotypic slice cultures: a technique has come of age. *Trends in*  
391 *Neurosciences* **20**, 471–477.
- 392 **Galli, R., Binda, E., Orfanelli, U., Cipelletti, B., Gritti, A., De Vitis, S., Fiocco, R.,**  
393 **Froni, C., DiMeco, F. and Vescovi, A. (2004).** Isolation and characterization of  
394 tumorigenic, stem-like neural precursors from human glioblastoma. *Cancer*  
395 *research* **64**, 7011–7021.
- 396 **Gilbertson, R. J. and Rich, J. N. (2007).** Making a tumour's bed: glioblastoma stem  
397 cells and the vascular niche. *Nat Rev Cancer* **7**, 733–736.
- 398 **Hemmati, H. D., Nakano, I., Lazareff, J. A., Masterman-Smith, M., Geschwind, D.**  
399 **H., Bronner-Fraser, M. and Kornblum, H. I. (2003).** Cancerous stem cells can  
400 arise from pediatric brain tumors. *Proc. Natl. Acad. Sci. U.S.A.* **100**, 15178–15183.
- 401 **Humpel, C. (2015).** Organotypic brain slice cultures: A review. *Neuroscience* **305**, 86–

- 402 98.
- 403 **Kokovay, E., Goderie, S., Wang, Y., Lotz, S., Lin, G., Sun, Y., Roysam, B., Shen,**  
404 **Q. and Temple, S.** (2010). Adult SVZ lineage cells home to and leave the vascular  
405 niche via differential responses to SDF1/CXCR4 signaling. *Cell Stem Cell* **7**, 163–  
406 173.
- 407 **Krusche, B., Ottone, C., Clements, M. P., Johnstone, E. R., Goetsch, K., Lieven,**  
408 **H., Mota, S. G., Singh, P., Khadayate, S., Ashraf, A., et al.** (2016). EphrinB2  
409 drives perivascular invasion and proliferation of glioblastoma stem-like cells. *Elife*  
410 **5**, 4565.
- 411 **Lee, J., Kotliarova, S., Kotliarov, Y., Li, A., Su, Q., Donin, N. M., Pastorino, S.,**  
412 **Purow, B. W., Christopher, N., Zhang, W., et al.** (2006). Tumor stem cells  
413 derived from glioblastomas cultured in bFGF and EGF more closely mirror the  
414 phenotype and genotype of primary tumors than do serum-cultured cell lines.  
415 *Cancer Cell* **9**, 391–403.
- 416 **Llorens-Bobadilla, E., Zhao, S., Baser, A., Saiz-Castro, G., Zwadlo, K. and Martin-**  
417 **Villalba, A.** (2015). Single-Cell Transcriptomics Reveals a Population of Dormant  
418 Neural Stem Cells that Become Activated upon Brain Injury. *Stem Cell* **17**, 329–  
419 340.
- 420 **Mirzadeh, Z., Merkle, F. T., Soriano-Navarro, M., Garcia-Verdugo, J.-M. and**  
421 **Alvarez-Buylla, A.** (2008). Neural stem cells confer unique pinwheel architecture  
422 to the ventricular surface in neurogenic regions of the adult brain. *Cell Stem Cell* **3**,  
423 265–278.
- 424 **Okawa, S., Gargica, S., Blin, C., Ender, C., Pollard, S. M. and Krijgsveld, J.**  
425 (2016). Proteome and Secretome Characterization of Glioblastoma-Derived  
426 Neural Stem Cells. *Stem Cells*.
- 427 **Piccirillo, S. G. M., Piccirillo, S. G. M., Spiteri, I., Spiteri, I., Sottoriva, A.,**  
428 **Sottoriva, A., Touloumis, A., Touloumis, A., Ber, S., Ber, S., et al.** (2015).  
429 Contributions to Drug Resistance in Glioblastoma Derived from Malignant Cells in  
430 the Sub-Ependymal Zone. *Cancer research* **75**, 194–202.
- 431 **Podergajs, N., Motaln, H., Rajčević, U., Verbovšek, U., Koršič, M., Obad, N.,**  
432 **Espedal, H., Vittori, M., Herold-Mende, C., Miletic, H., et al.** (2015).  
433 Transmembrane protein CD9 is glioblastoma biomarker, relevant for maintenance  
434 of glioblastoma stem cells. *Oncotarget*.
- 435 **Pollard, S. M., Yoshikawa, K., Clarke, I. D., Danovi, D., Stricker, S., Russell, R.,**  
436 **Bayani, J., Head, R., Lee, M., Bernstein, M., et al.** (2009). Glioma stem cell lines  
437 expanded in adherent culture have tumor-specific phenotypes and are suitable for  
438 chemical and genetic screens. *Cell Stem Cell* **4**, 568–580.
- 439 **Shen, Q., Wang, Y., Kokovay, E., Lin, G., Chuang, S.-M., Goderie, S. K., Roysam,**  
440 **B. and Temple, S.** (2008). Adult SVZ stem cells lie in a vascular niche: a  
441 quantitative analysis of niche cell-cell interactions. *Cell Stem Cell* **3**, 289–300.
- 442 **Shin, J., Berg, D. A., Zhu, Y., Shin, J. Y., Song, J., Bonaguidi, M. A., Enikolopov,**  
443 **G., Nauen, D. W., Christian, K. M., Ming, G.-L., et al.** (2015). Single-Cell RNA-

- 444       Seq with Waterfall Reveals Molecular Cascades underlying Adult Neurogenesis.  
445       *Stem Cell* **17**, 360–372.
- 446       **Silva-Vargas, V., Maldonado-Soto, A. R., Mizrak, D., Codega, P. and Doetsch, F.**  
447       (2016). Age-Dependent Niche Signals from the Choroid Plexus Regulate Adult  
448       Neural Stem Cells. *Stem Cell* 1–11.
- 449       **Stricker, S. H., Feber, A., Engstrom, P. G., Carén, H., Kurian, K. M., Takashima,**  
450       **Y., Watts, C., Way, M., Dirks, P., Bertone, P., et al.** (2013). Widespread resetting  
451       of DNA methylation in glioblastoma-initiating cells suppresses malignant cellular  
452       behavior in a lineage-dependent manner. *Genes & development* **27**, 654–669.
- 453       **Stupp, R., Mason, W. P., van den Bent, M. J., Weller, M., Fisher, B., Taphoorn, M.**  
454       **J. B., Belanger, K., Brandes, A. A., Marosi, C., Bogdahn, U., et al.** (2005).  
455       Radiotherapy plus concomitant and adjuvant temozolomide for glioblastoma. *N.*  
456       *Engl. J. Med.* **352**, 987–996.
- 457       **Ullrich, C., Daschil, N. and Humpel, C.** (2011). Organotypic vibrosections: Novel  
458       whole sagittal brain cultures. *J Neurosci Methods* **201**, 131–141.
- 459       **Xie, Y., Bergström, T., Jiang, Y., Johansson, P., Marinescu, V. D., Lindberg, N.,**  
460       **Segerman, A., Wicher, G., Niklasson, M., Baskaran, S., et al.**
- 461

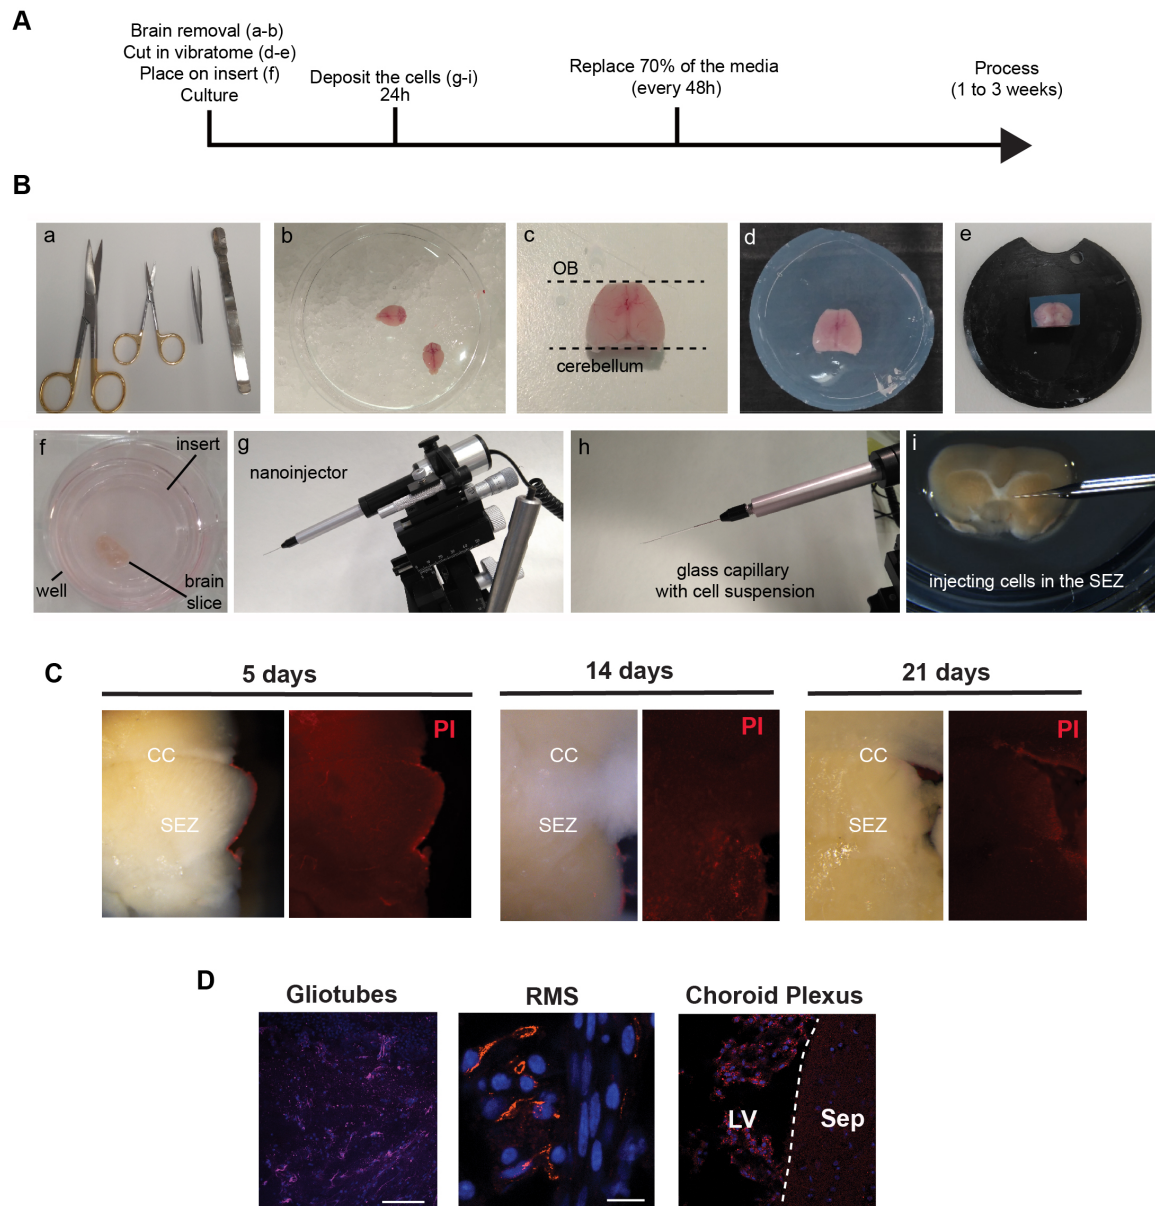

**Figure 1 | Overall experimental strategy and tissue processing.** (A) Summary of experimental procedure to generate slices. (B) Experimental steps in the harvesting, mounting, slicing and injection of brain tissue; (a) scissors, forceps and spatula are used to isolate and dissect the whole brain; (b) Image of whole adult mice brain on ice following harvesting; (c) Dorsal image of whole brain following removal of the olfactory bulb (OB) and cerebellum; (d) Embedded brain in low melting agarose; (e) Attached brain to the support of the vibratome; (f) ~250 $\mu$ m coronal brain slice of placed onto a cell culture insert in a 6 well plate with neural stem cell basal media; (g) nanoinjector

mounted on a micromanipulator used for injection of small volumes of cells, with mounted glass capillary (h), containing cell suspension; and (i) microinjection of cells into the SEZ of a coronal brain slice on the cell culture insert. (C) Viability of the tissue assessed using propidium iodide after 5, 14 and 21 days. (D) Immunocytochemistry following 7 days slice co-culture for: GFAP positive gliotubes (magenta; left panel); DCX-positive neuroblasts (middle panel) and choroid plexus (autofluorescence; right). Nuclear counterstaining with DAPI in each (blue). SEZ: subependymal zone; CC, corpus callosum; LV; lateral ventricle, Sep: Septum. RMS; Rostral migratory stream. Scale bars: 100 $\mu$ m (left) and 10 $\mu$ m (right).

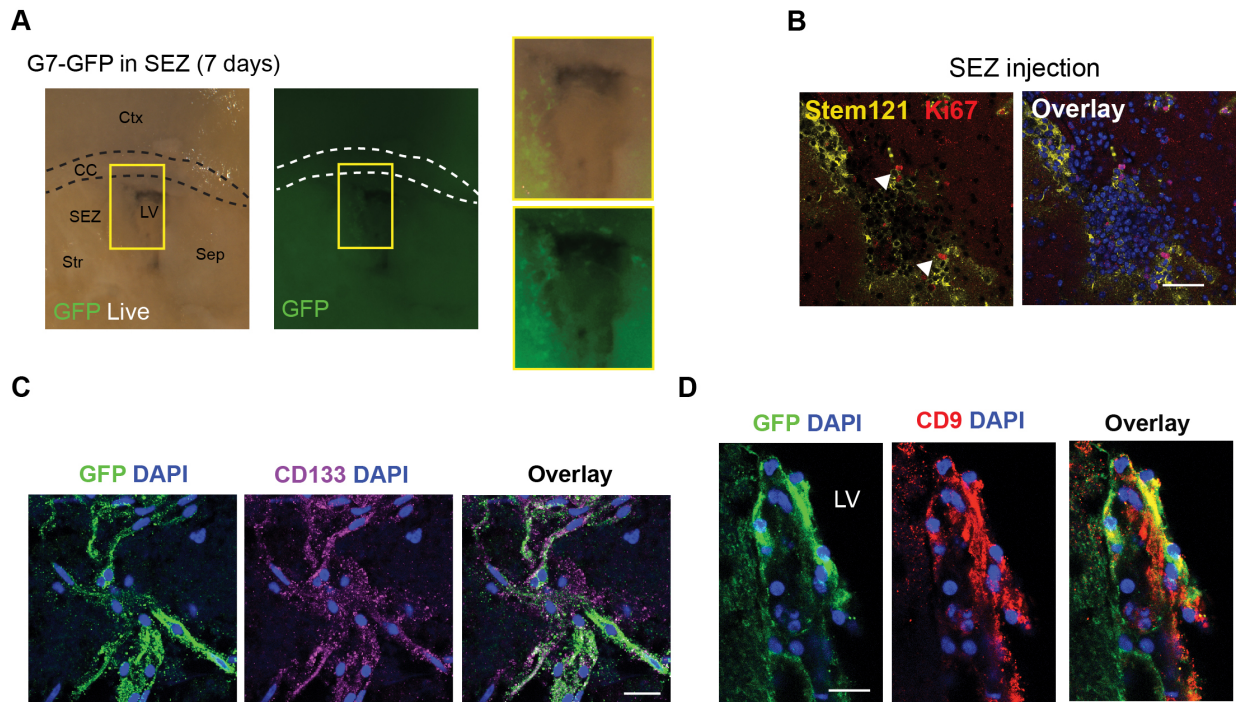

**Figure 2 | Human patient-derived glioma stem cells engraft in adult mouse subependymal zone.** (A) Direct microinjection of human line into adult SEZ and visualization of engrafted live cells using a constitutive GFP reporter. Right panels are zoom of left panels. (B) Immunostaining for human specific cytoplasmic antigen (Stem121; yellow) and Ki67 (red) after 14 days. (C and D) Marker analysis after 21 days of ex vivo culture; (C) immunocytochemistry for CD133 (purple); (D) CD9 (red). Nuclear counterstaining with DAPI (blue). Scale bars: B = 50  $\mu$ m and C, D = 20  $\mu$ m.



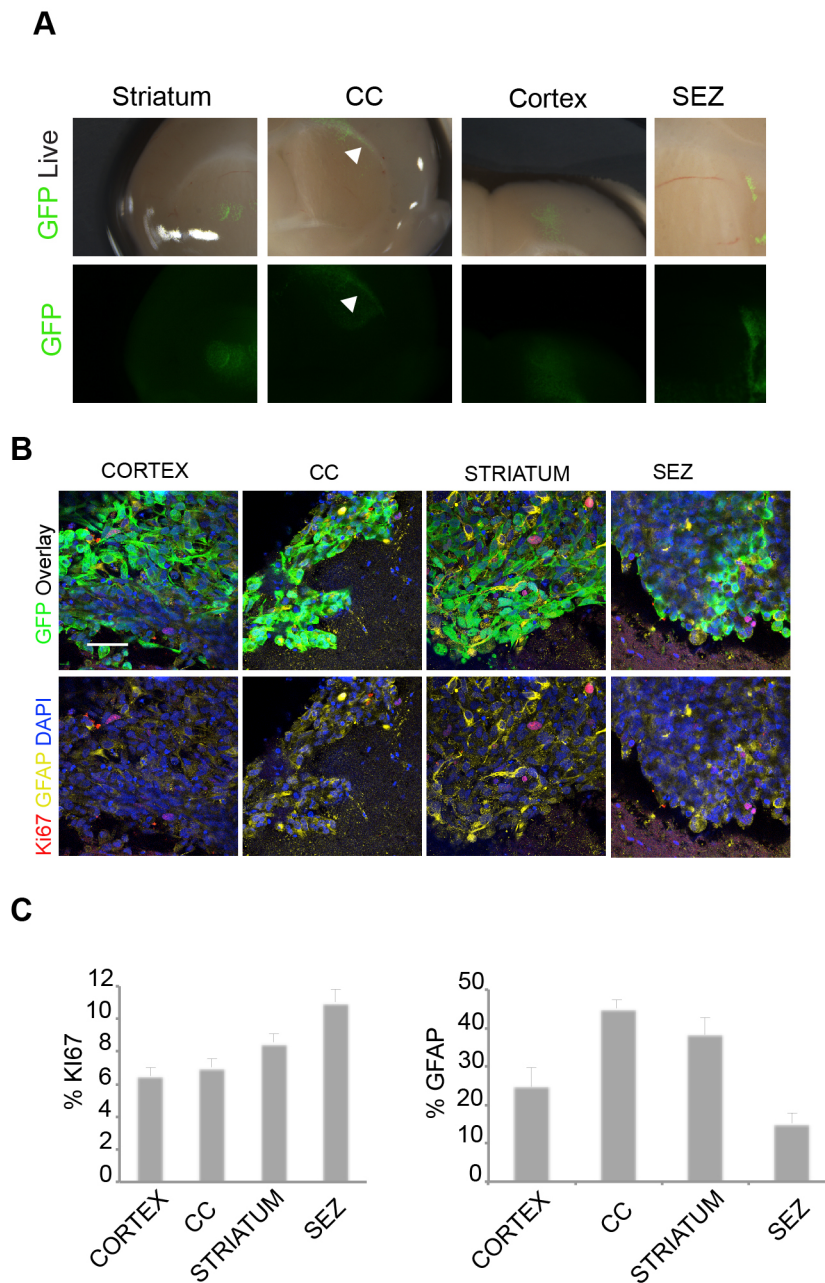

**Figure 3 | Differential proliferative responses to human glioma stem cells engrafted into different brain regions.** (A) Live images of G7-GFP human glioma stem cells deposited into distinct regions of the same coronal brain slice after 7 days. (B) Immunocytochemistry for GFAP (yellow) and Ki67 (red) and GFP (green). CC: corpus callosum. (C) Quantification of the percentage of proliferating and differentiating cells (Ki67 and GFAP, respectively).

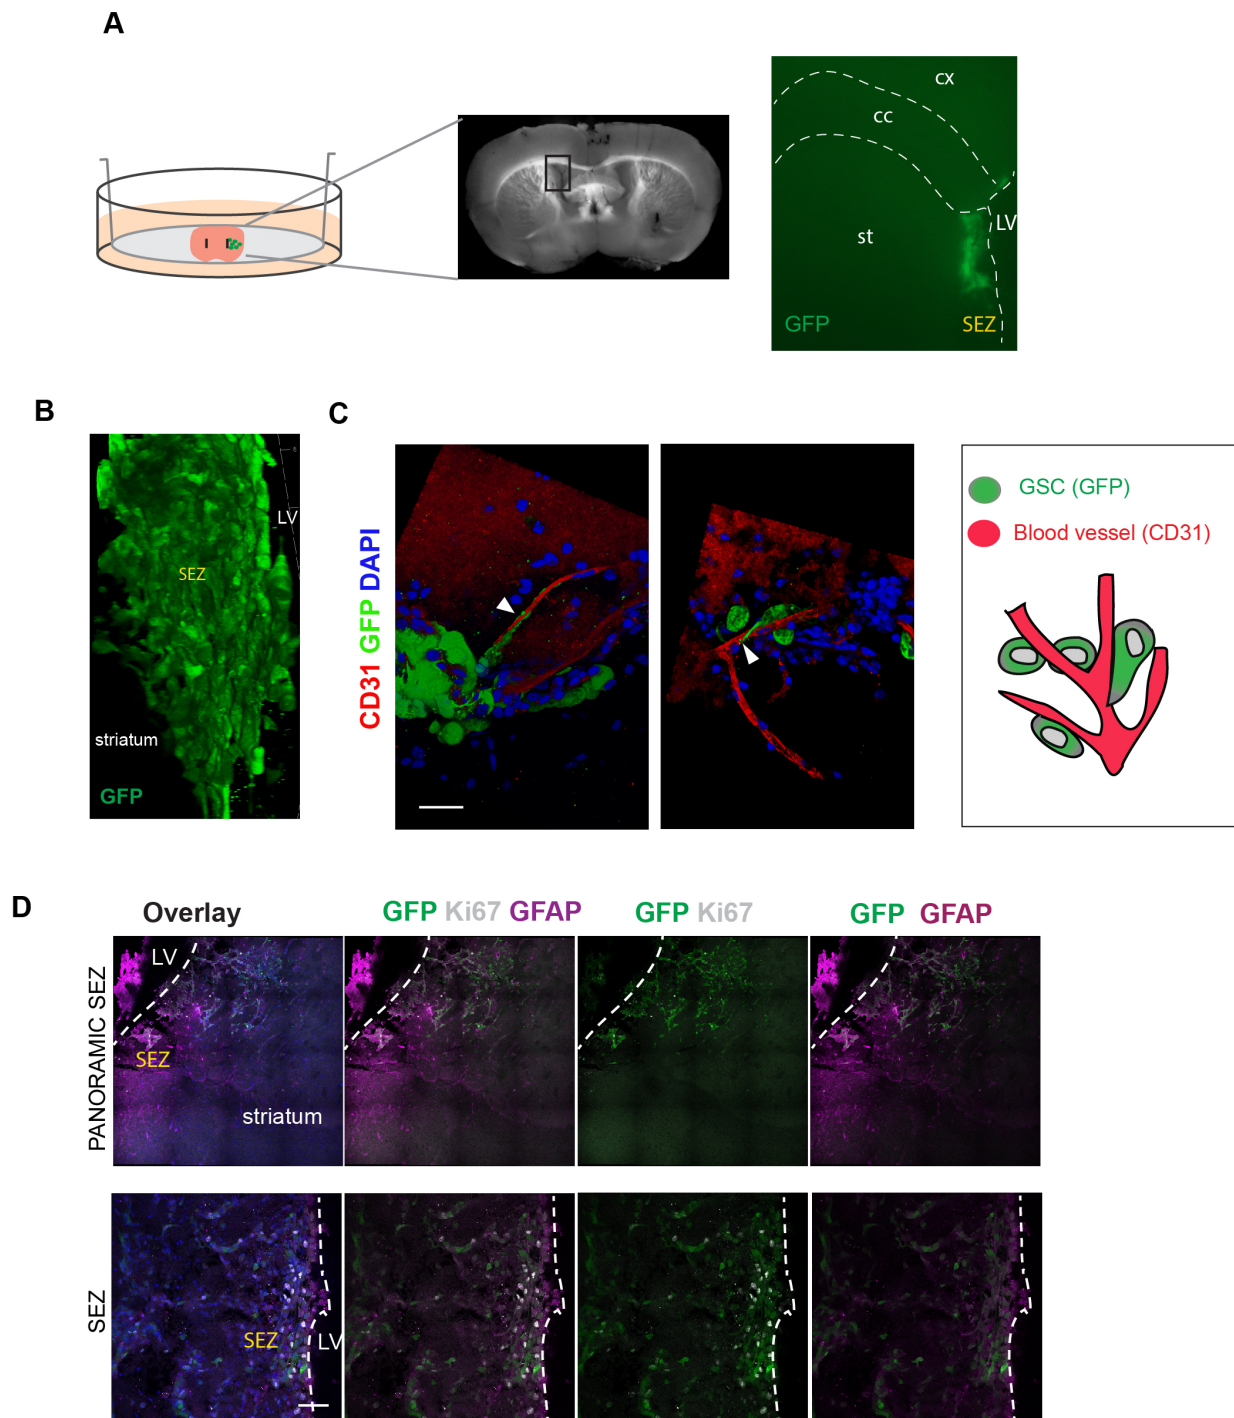

vessels. GFP (green), CD31 (red) and nuclear counterstaining with DAPI (blue). Schematic of the interaction GSC with brain blood vessels (right). (D) Top panels: Panoramic view of IENS-GFP cells in SEZ. Immunostaining for GFP (green), Ki67 (white), GFAP (purple) and nuclear counterstaining with DAPI (blue). Lower panels: Cells proliferating and expressing some GSC and astrocytic marker as GFAP and the proliferative marker Ki67. In (A) cx, cortex; cc, corpus callosum; st, striatum; SEZ, subependymal zone; LV, lateral ventricle. Scale in (C) 20 $\mu$ m (D) 50 $\mu$ m.

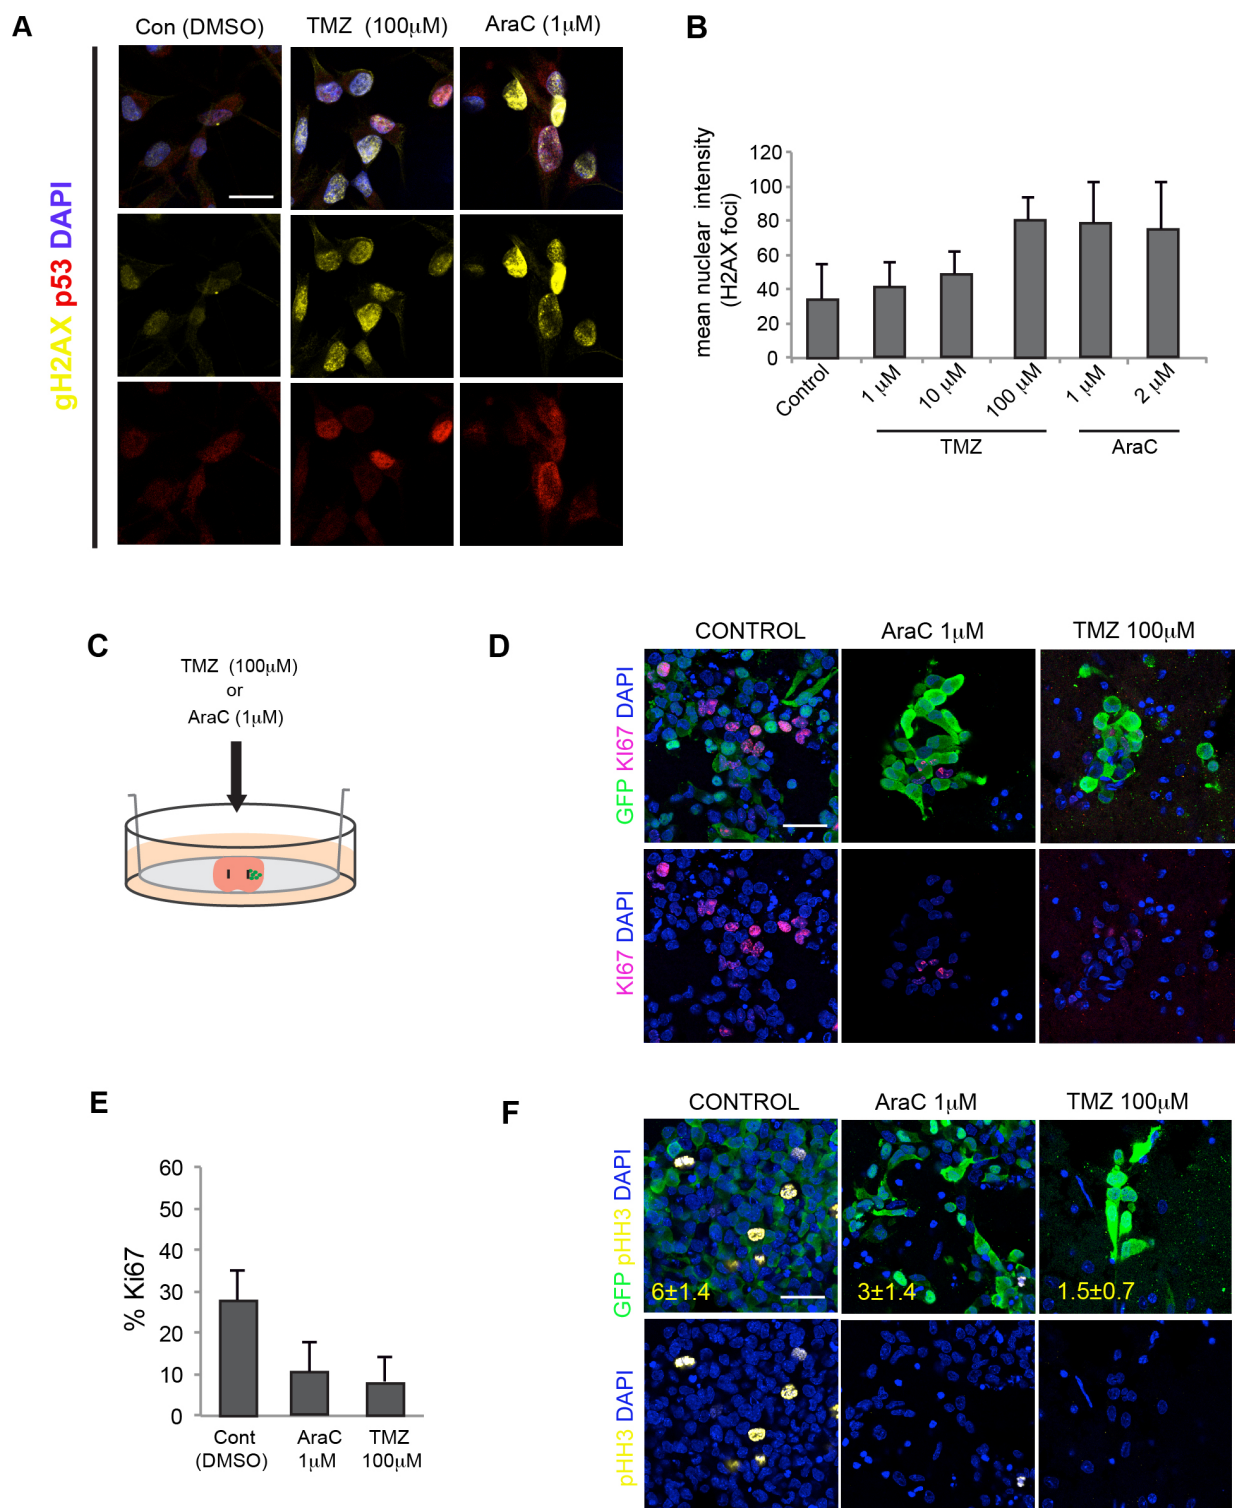

**Figure 5 | Temozolomide and Ara-C treatment of slice co-cultures.** (A) DNA damage responses of mouse IENS-GFP cells following treatment various doses of antimitotic agents AraC and TMZ. Immunocytochemistry for  $\gamma$ H2AX (yellow) and p53 (red). Nuclear counterstaining DAPI (blue). (B) Quantitation of mean intensity of the

nuclear H2AX foci (arbitrary units). (C) Schematic of the co-culture of IENS-GFP cells in the brain slices adding pharmacological inhibitors of the proliferation. (D) Immunostaining for GFP (green) and Ki67 (magenta) with DAPI (blue) for nuclear counterstaining. (E) Quantification of the percentage of Ki67 (proliferative cells) using the proliferative inhibitors in IENS-GFP after 24 hours. (F) Immunocytochemistry for GFP (green) and pHH3 (mitotic cells) (yellow) in IENS-GFP after treatments. Percentage of pHH3 positive cells are in red typing. Scale bar in (A) 10  $\mu\text{m}$  (D), (F) 20 $\mu\text{m}$ .

**Movie 1** (for Figure 2). Living IENS-GFP moving through the brain tissue after 10 days.

**Movie 2** (for Figure 2). 3D reconstitution of the IENS-GFP (green) engraftment in the SEZ after 5 days.

**Movie 3** (for Figure 2). 3D reconstitution of reconstitution showing the interaction between the IENS-GFP (green) and blood brain vessels (red). Nuclear counterstaining with DAPI (blue or grey).

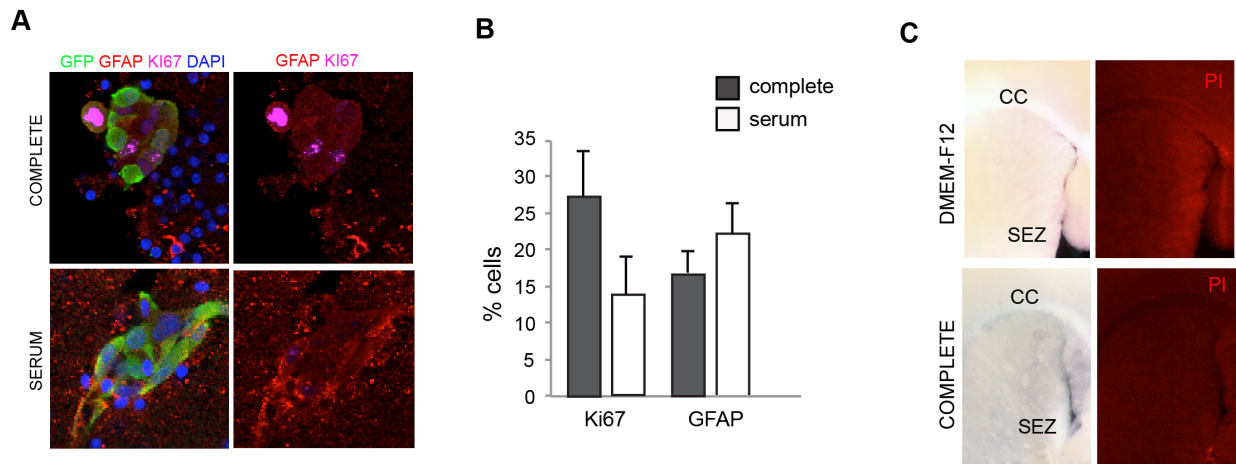

**Supplementary Figure 1 |** (A) Immunostaining for GFAP (red) and Ki67 (magenta) of IENS-GFP cells deposited in the brain slices with complete media with/without serum. (B) Quantification of the percentage of cells positive for GFAP and Ki67. (C) PI staining in brain slices after 24 hours. Slices were cultured with DMEM-F12 or with complete media.

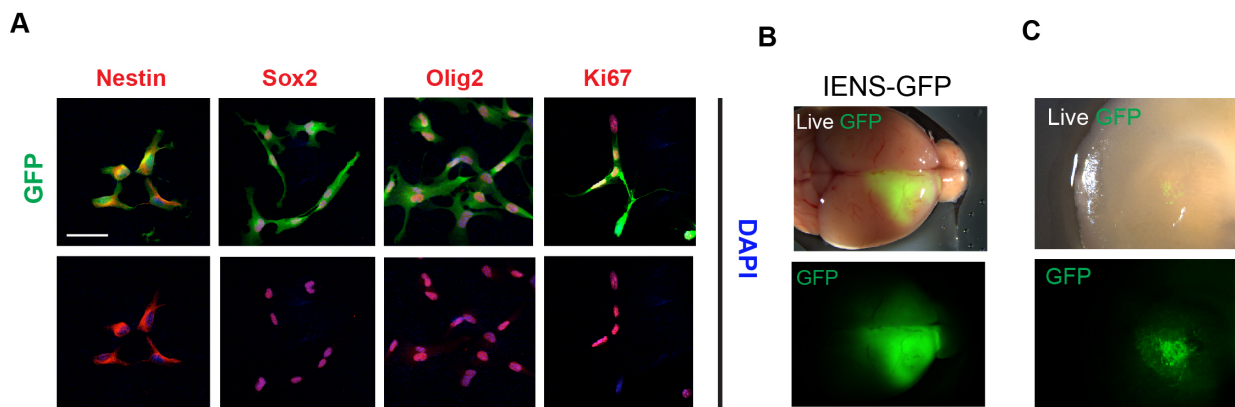

**Supplementary Figure 2 |** (A) IENS-GFP (green) express GSC markers Nestin, Sox2, Olig2 and Ki67 (red) with nuclear counterstaining DAPI (blue) and (B) are tumorigenic. (C) IENS-GFP deposited in the striatum. Scale bar in A: 20  $\mu$ m.
